# Supplementary material for: Phototriggered sulfoxide isomerization in [Ru(pic)2(dmso)2]
Source: Royal Society of Chemistry journal article supplement (doi:10.1039/b704205a), 2007-01-01
Supplement: b704205a.pdf [file b704205a.pdf]

# Phototriggered Sulfoxide Isomerization in [Ru(pic)<sub>2</sub>(dmsO)<sub>2</sub>]

*Aaron A. Rachford, Jeffrey L. Petersen† and Jeffrey J. Rack\**

Department of Chemistry and Biochemistry, Ohio University, Athens, OH 45701.

†C. Eugene Bennett Department of Chemistry, West Virginia University, Morgantown,

WV 26506-6045

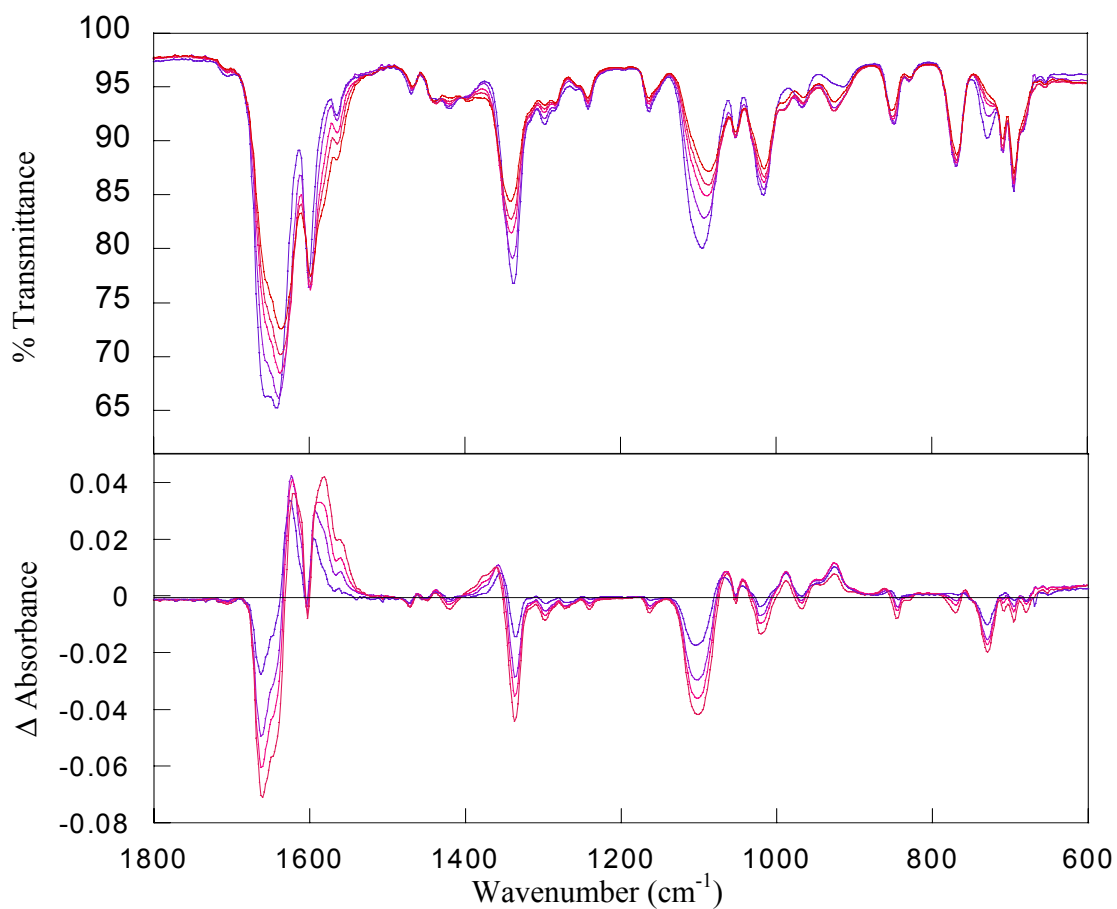

**Figure S1.** Infrared spectra depicting absorption changes (blue to red) upon 355 nm irradiation of the sample (upper panel) and subtraction spectra highlighting changes in absorption (lower panel).

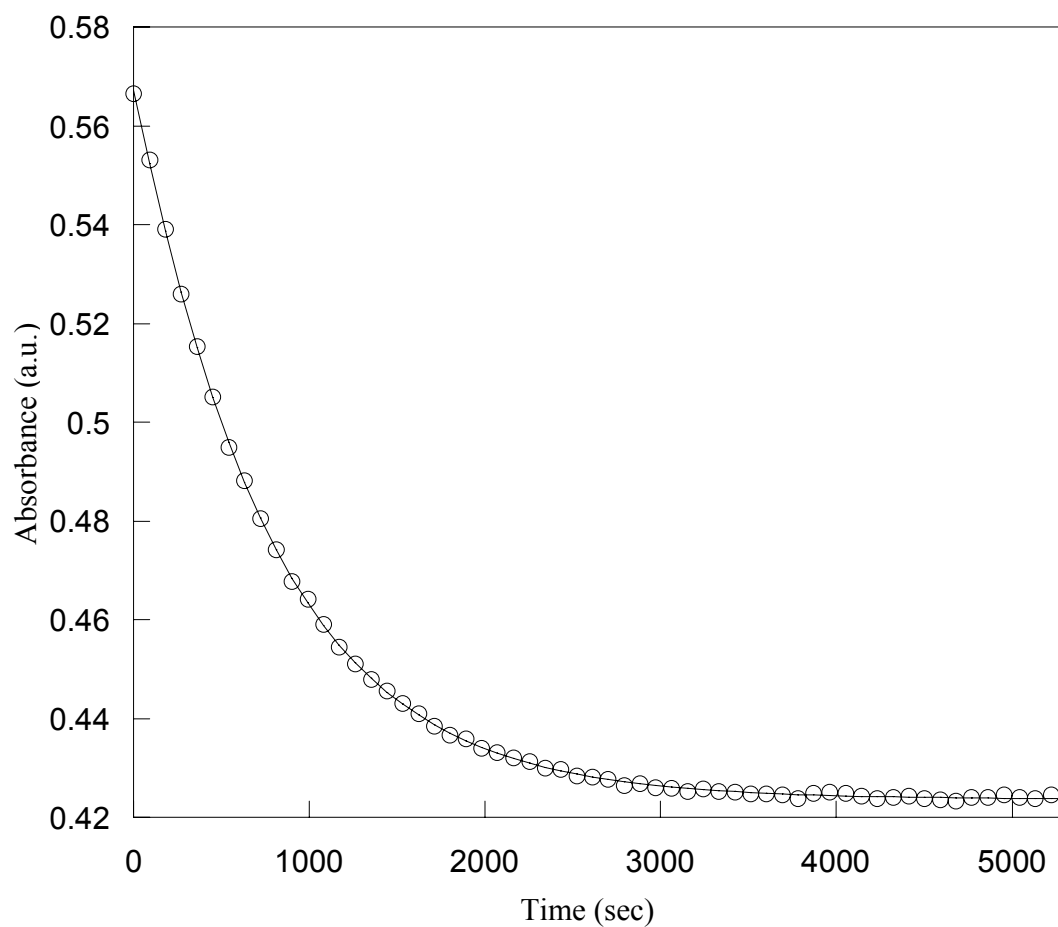

**Figure S2.** Selected time trace at  $\lambda_{\text{obs}} = 372$  nm. Solid line represents the biexponential (A $\rightarrow$ B $\rightarrow$ C) fit to the absorbance data (open circles).

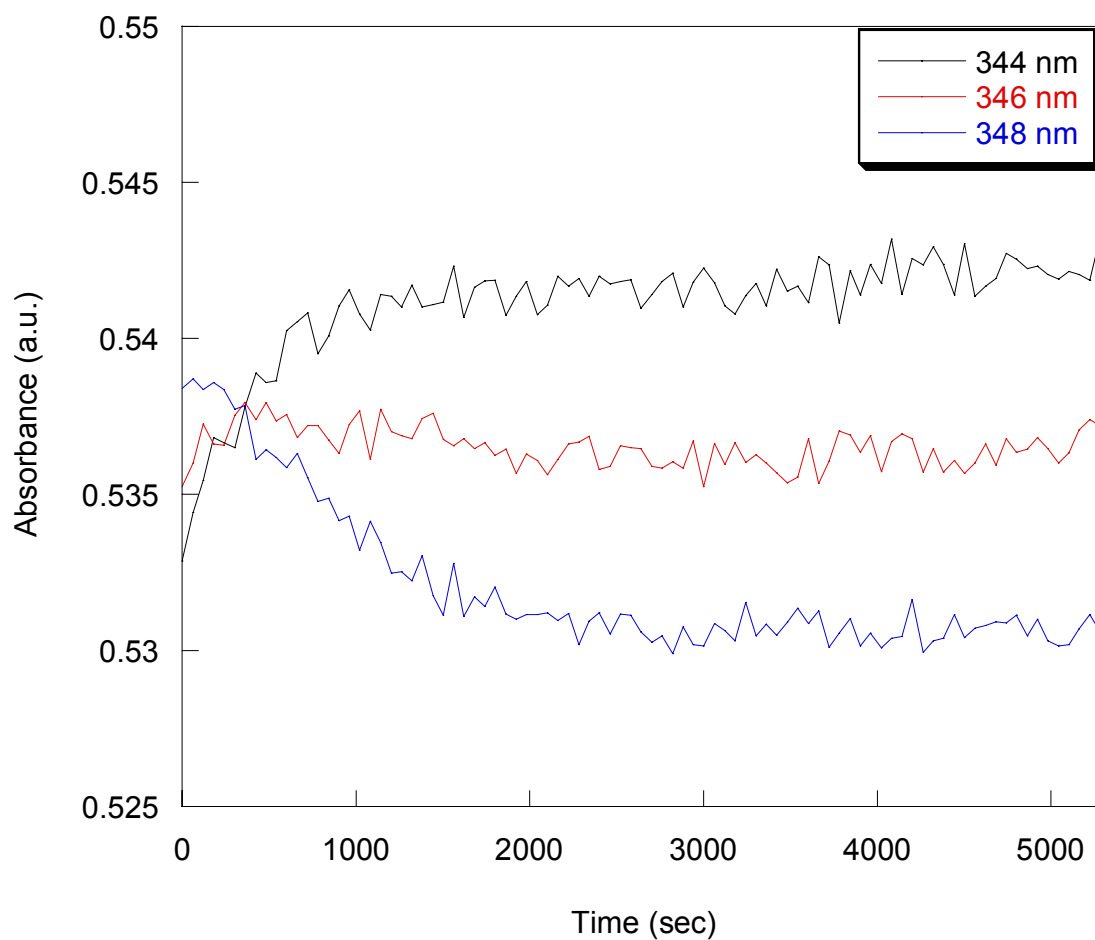

**Figure S3.** Selected time trace at  $\lambda_{\text{obs}} = 344$  nm (black), 346 nm (red), and 348 nm (blue). Traces further highlight biphasic (A $\rightarrow$ B $\rightarrow$ C) nature of absorption data near pseudoisobestic point.
